# Supplementary material for: ACC neural ensemble dynamics are structured by strategy prevalence
Source: eLife journal article supplement (doi:10.7554/elife.84897), 2023-11-22
Supplement: supp [file elife_poa_e84897_Figure_1_figure_supplement_1.pdf › elife_poa_e84897_Figure_1_figure_supplement_1.pdf]

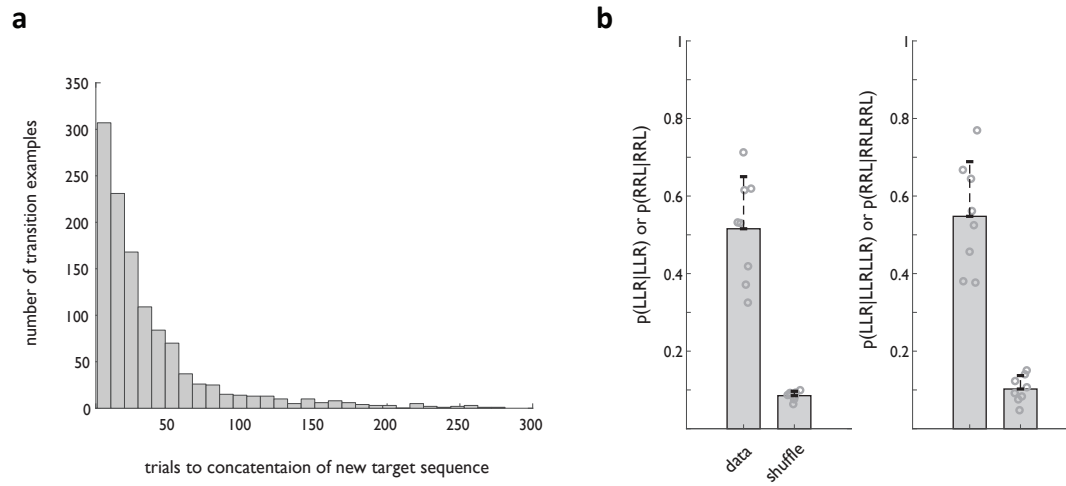

**Proskurin, Manakov and Karpova, Figure 1- figure supplement 1 | Robustness of sequencing behavior.** **a.** Distribution of trials to concatenation of the new target sequence for all transitions in the dataset from the implanted animals. **b.** Probability of target sequence concatenation in individual animals. See also Figure 2c for additional evidence of behavioral robustness.
