# Supplementary material for: ACC neural ensemble dynamics are structured by strategy prevalence
Source: eLife journal article supplement (doi:10.7554/elife.84897), 2023-11-22
Supplement: supp [file elife_poa_e84897_Figure_3_figure_supplement_1.pdf › elife_poa_e84897_Figure_3_figure_supplement_1.pdf]

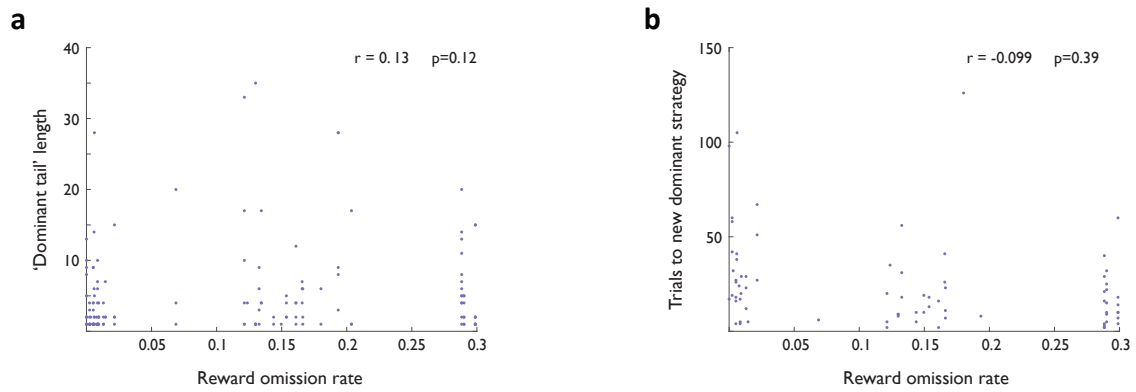

**Proskurin, Manakov and Karpova, Figure 3- supplement 1. Behavior at block transitions is not a function of reinforcement. a.** Length of 'dominant tails' as a function of reward omission rate. **b.** Number of trials until a new dominant strategy is established as a function of reward omission rate.
