# Supplementary material for: ACC neural ensemble dynamics are structured by strategy prevalence
Source: eLife journal article supplement (doi:10.7554/elife.84897), 2023-11-22
Supplement: supp [file elife_poa_e84897_Figure_4_figure_supplement_1.pdf › elife_poa_e84897_Figure_4_figure_supplement_1.pdf]

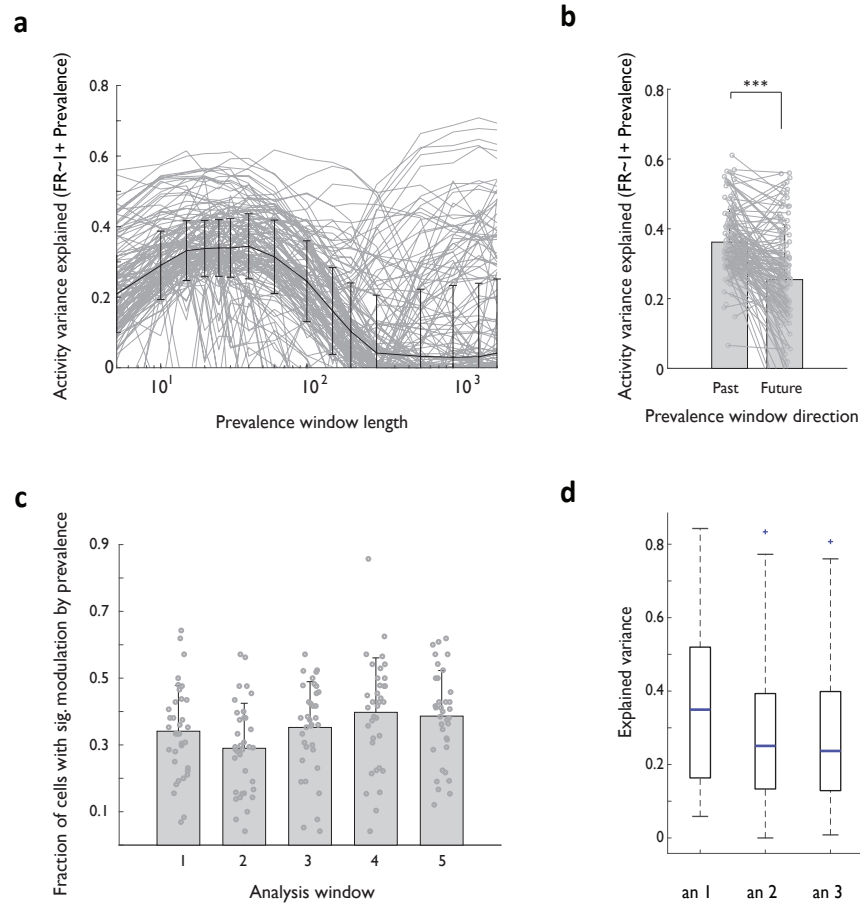

**Proskurin, Manakov and Karpova, Figure 4 - figure supplement 1 | Modulation of ACC activity is best explained by prevalence in recent (within tens of trials) past, robust across analysis windows and animals. a.** Explained variance in neural activity associated with RRL sequence execution – for models without context as a parameter – as a function of the number of trials in recent past used to estimate local RRL sequence prevalence. **b.** Explained variance in neural activity associated with RRL sequence execution for models that use local sequence prevalence in recent past (Past) or in the equivalent upcoming period (Future). **c.** Fraction of all recorded ACC units displaying a significant modulation by sequence prevalence for each of the five analysis windows. **d.** Explained variance of A32D neural activity during sequence execution in 3 animals. Ensemble size: 16 (an 1), 73 (an 2), 128 (an 3)
