# Supplementary material for: ACC neural ensemble dynamics are structured by strategy prevalence
Source: eLife journal article supplement (doi:10.7554/elife.84897), 2023-11-22
Supplement: supp [file elife_poa_e84897_Figure_4_figure_supplement_2.pdf › elife_poa_e84897_Figure_4_figure_supplement_2.pdf]

**a**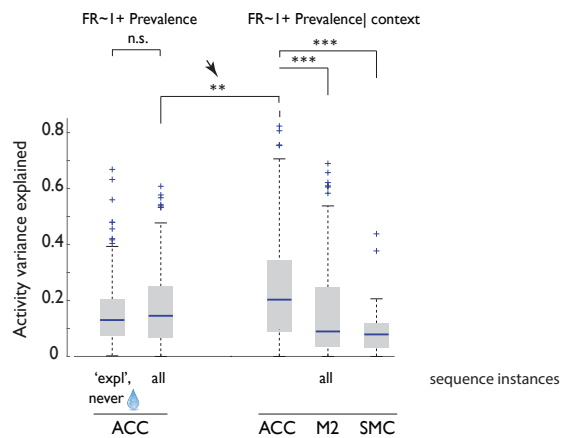**c**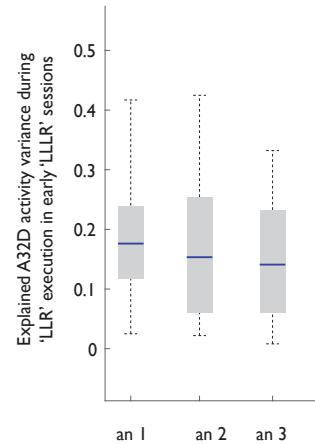**b**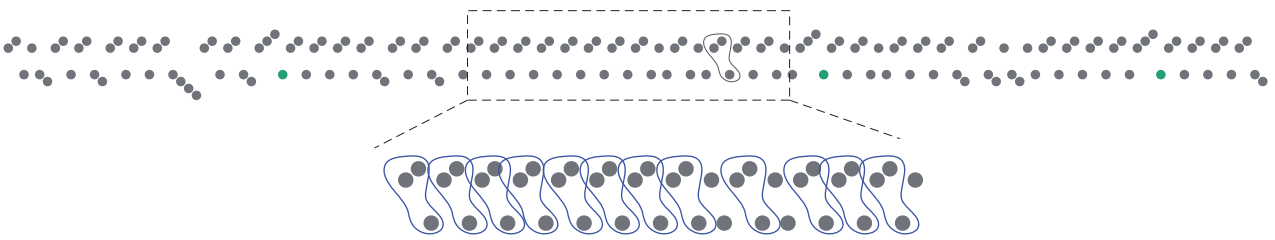

**Proskurin, Manakov and Karpova, Figure 4 - figure supplement 2 | Models relating neural activity to strategy prevalence retain robustness when trained on unrewarded sequence instances and display more robust performance in ACC than in other areas of the medial frontal lobe.** **a.** Cross-validated performance of linear models relating local sequence prevalence (with and without global context – ‘exploratory’ or ‘dominant’ as a fixed parameter) to ACC, M2 and SMC neural activity. exp, fit done for exploratory sequence instances only; all, fits done for all sequence instances. Arrow points to improved performance when global context is included as a parameter. **b.** Example behavioral trace in an early ‘LLLR’ acquisition session. Notice persistence with the unrewarded cognate shorter sequence, ‘LLR’. **c.** ACC A32D activity variance explained by unrewarded ‘LLR’ (or ‘RRRL’) sequence prevalence in early ‘LLLR’/‘RRRL’ acquisition sessions from 3 animals.
