# Supplementary material for: ACC neural ensemble dynamics are structured by strategy prevalence
Source: eLife journal article supplement (doi:10.7554/elife.84897), 2023-11-22
Supplement: supp [file elife_poa_e84897_Figure_4_figure_supplement_3.pdf › elife_poa_e84897_Figure_4_figure_supplement_3.pdf]

**a**

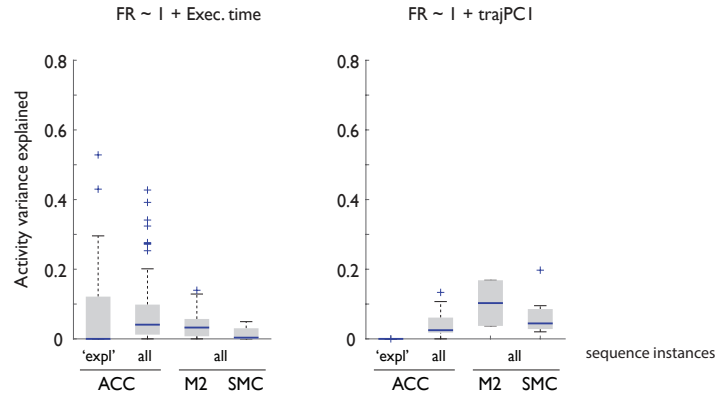

**b**

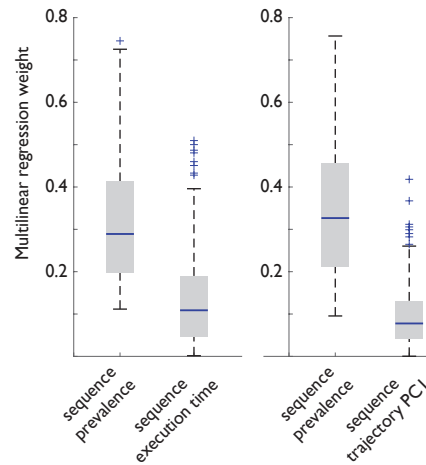

**c**

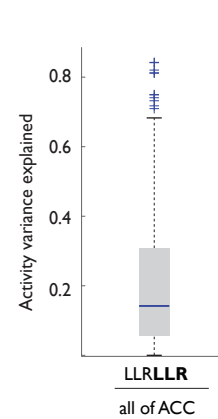

**Proskurin, Manakov and Karpova, Figure 4 - figure supplement 3 | Variance of movement vigor and trajectory, or local differences in other past choices cannot account for the robustness of sequence prevalence models in explaining ACC neural activity variance. a**, Cross-validated performance of linear models relating sequence execution time (left) or the first principal component of the associated trajectory (right) to ACC, M2 and SMC neural activity. **b**. Regression weights obtained when the linear model relating sequence prevalence to firing rate was expanded to include either sequence execution time (left) or the first principal component of the associated trajectory for the dataset from area A32D. Note that to permit direct weight comparison, all parameters were z-score normalized to zero mean and standard deviation of 1 prior to fitting the model. **c**. Cross-validated performance of the prevalence model trained on a subsample of the dataset matched in recent history.
