# Supplementary material for: ACC neural ensemble dynamics are structured by strategy prevalence
Source: eLife journal article supplement (doi:10.7554/elife.84897), 2023-11-22
Supplement: supp [file elife_poa_e84897_Figure_5_figure_supplement_1.pdf › elife_poa_e84897_Figure_5_figure_supplement_1.pdf]

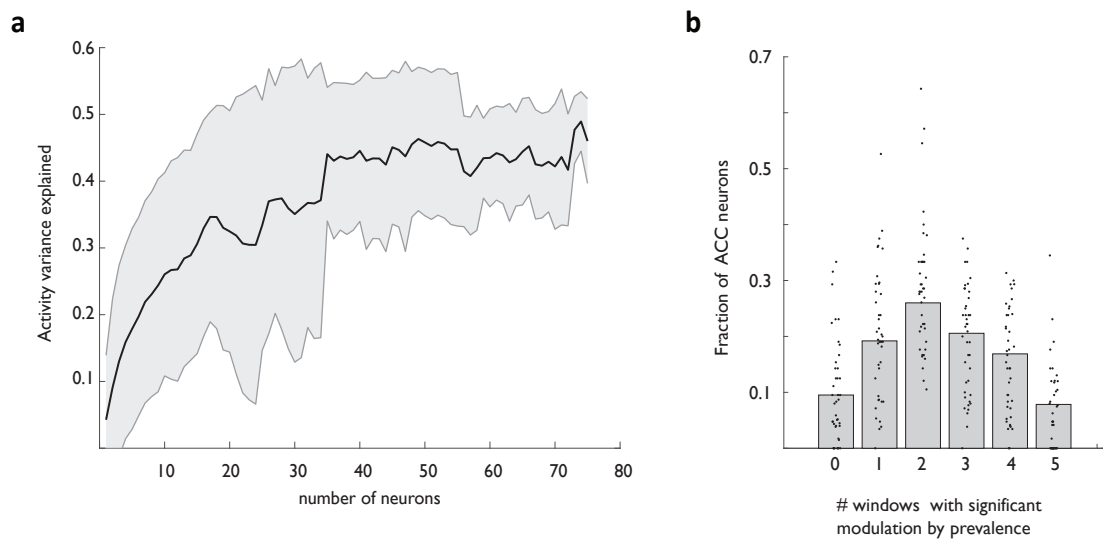

**Proskurin, Manakov and Karpova, Figure 5 - figure supplement 1 | Prevalence decodability scales with the ACC ensemble size, but rarely persists throughout the temporal extent of strategy execution at the single neuron level.**

**a.** Explained variance of prevalence (estimated using the 20-trial window of past choices) as a function of the size of the ACC ensemble. **b.** Fraction of ACC neurons displaying modulation in a specific subset of the five analysis windows.
